# Supplementary material for: Proteomics Reveals the Obstruction of Cellular ATP Synthesis in the Ruminal Epithelium of Growth-Retarded Yaks
Source: MDPI journal article supplement (doi:10.3390/ani14081243), 2024-04-22
Supplement: s1 [file s1]

Supplementary Table S1. Gene ontology (GO) analysis of DEPs in ruminal epithelium between GRY and GNY.

| Categories              | Gene Ontology term                                       | Cluster frequency         | <i>P</i> -value |
|-------------------------|----------------------------------------------------------|---------------------------|-----------------|
| cellular component (CC) | proton-transporting V-type ATPase complex                | 2 out of 40 genes, 5.0%   | 0.024           |
|                         | plasma membrane                                          | 12 out of 40 genes, 30.0% | 0.042           |
| molecular function (MF) | steroid hormone receptor binding                         | 2 out of 42 genes, 4.8%   | 0.017           |
|                         | nuclear hormone receptor binding                         | 2 out of 42 genes, 4.8%   | 0.032           |
|                         | hormone receptor binding                                 | 2 out of 42 genes, 4.8%   | 0.038           |
|                         | active transmembrane transporter activity                | 3 out of 42 genes, 7.1%   | 0.039           |
| biological process (BP) | transition metal ion transport                           | 3 out of 35 genes, 8.6%   | 0.003           |
|                         | cellular transition metal ion homeostasis                | 3 out of 35 genes, 8.6%   | 0.007           |
|                         | transition metal ion homeostasis                         | 3 out of 35 genes, 8.6%   | 0.011           |
|                         | mRNA splice site selection                               | 2 out of 35 genes, 5.7%   | 0.013           |
|                         | regulation of centrosome cycle                           | 2 out of 35 genes, 5.7%   | 0.013           |
|                         | response to nutrient                                     | 2 out of 35 genes, 5.7%   | 0.017           |
|                         | intracellular steroid hormone receptor signaling pathway | 2 out of 35 genes, 5.7%   | 0.017           |
|                         | steroid hormone mediated signaling pathway               | 2 out of 35 genes, 5.7%   | 0.017           |
|                         | hormone-mediated signaling pathway                       | 2 out of 35 genes, 5.7%   | 0.021           |
|                         | cellular cation homeostasis                              | 4 out of 35 genes, 11.4%  | 0.025           |
|                         | glutathione metabolic process                            | 2 out of 35 genes, 5.7%   | 0.025           |
|                         | cellular ion homeostasis                                 | 4 out of 35 genes, 11.4%  | 0.028           |
|                         | iron ion transport                                       | 2 out of 35 genes, 5.7%   | 0.030           |

|                                                             |                             |       |
|-------------------------------------------------------------|-----------------------------|-------|
| intracellular receptor signaling pathway                    | 2 out of 35<br>genes, 5.7%  | 0.030 |
| homeostatic process                                         | 7 out of 35<br>genes, 20.0% | 0.030 |
| cation homeostasis                                          | 4 out of 35<br>genes, 11.4% | 0.034 |
| regulation of alternative mRNA splicing,<br>via spliceosome | 2 out of 35<br>genes, 5.7%  | 0.035 |
| tissue homeostasis                                          | 2 out of 35<br>genes, 5.7%  | 0.035 |
| ion transport                                               | 5 out of 35<br>genes, 14.3% | 0.038 |
| inorganic ion homeostasis                                   | 4 out of 35<br>genes, 11.4% | 0.038 |
| regulation of RNA splicing                                  | 3 out of 35<br>genes, 8.6%  | 0.039 |
| metal ion transport                                         | 3 out of 35<br>genes, 8.6%  | 0.042 |
| cellular chemical homeostasis                               | 4 out of 35<br>genes, 11.4% | 0.042 |
| cellular homeostasis                                        | 5 out of 35<br>genes, 14.3% | 0.043 |
| ion homeostasis                                             | 4 out of 35<br>genes, 11.4% | 0.045 |
| cellular iron ion homeostasis                               | 2 out of 35<br>genes, 5.7%  | 0.046 |
| cation transport                                            | 4 out of 35<br>genes, 11.4% | 0.050 |
